# Supplementary material for: Lysosome-targeting pH indicator based on peri-fused naphthalene monoimide with superior stability for long term live cell imaging
Source: Royal Society of Chemistry journal article supplement (doi:10.1039/d0tb02208j), 2020-11-13
Supplement: d0tb02208j2.pdf [file d0tb02208j2.pdf]

## Electronic supplementary information

### Lysosome-targeting pH indicator based on peri-fused naphthalene monoimide with superior stability for long term live cell imaging

Astrid Tannert,<sup>a,b</sup> Javier Garcia Lopez,<sup>d,f</sup> Nikolay Petkov,<sup>e</sup> Anela Ivanova,<sup>e</sup> Kalina Peneva,<sup>d,f</sup> and Ute Neugebauer<sup>\*a,b,c,e,f</sup>

<sup>a</sup> Leibniz Institute of Photonic Technology, Albert-Einstein-Str. 9, 07745 Jena, Germany

<sup>b</sup> Center for Sepsis Control and Care, Jena University Hospital, Am Klinikum 1, 07747 Jena, Germany.

<sup>c</sup> Institute of Physical Chemistry and Abbe School of Photonics, Friedrich Schiller University Jena, Helmholtzweg 4, 07743 Jena, Germany.

<sup>d</sup> Institute of Organic Chemistry and Macromolecular Chemistry, Friedrich Schiller University Jena, Lessingstraße 8, 07743 Jena, Germany.

<sup>e</sup> Faculty of Chemistry and Pharmacy, Sofia University "St. Kliment Ohridski", 1 James Bourchier blvd., Sofia, Bulgaria

<sup>f</sup> Jena Center of Soft Matter (JCSM), Friedrich Schiller University Jena, Philosophenweg 7, 07743 Jena, Germany.

\* corresponding author, email: ute.neugebauer@leibniz-ipht.de

#### Synthetic procedures

##### General experimental details

Starting materials and solvents were purchased from Merck, Fluka, Fisher Scientific and Sigma Aldrich; they were used without further purification. All reactions were monitored by thin-layer chromatography, using Merck TLC Silica gel 60 F254 on aluminium sheets. Purifications by column chromatography were performed using Macherey-Nagel silica gel 60 (0.04 - 0.066 mm). Flash chromatography was performed using a puriFlash® XS520Plus purification system. Reactions under microwave irradiation were carried out in a Biotage® Initiator Classic microwave reactor. NMR analysis (<sup>1</sup>H and <sup>13</sup>C<sup>1</sup>H) was carried out with a Bruker Avance 300 MHz spectrometer. High-resolution mass spectra (HRMS) were recorded with a Finnigan MAT95XL using a micro ESI device. Accurate masses were obtained using the peak matching algorithm and Ultramark 1622 as standard.

Compounds **1 - 4** (as depicted in Scheme 1, main manuscript, for the synthesis of the naphthalene monoamide fluorophore peri-fused with a guanidinium group) were prepared as described previously.<sup>1,2</sup>

*N,N,N*-tributyl-6-(2-imino-6,8-dioxo-1,3,6,8-tetrahydropyrido[3,4,5-*g,h*]perimidin-7(2*H*)-yl) hexan-1-aminium bromide (**NMI-LS**): 7-(6-bromohexyl)-2-imino-2,3-dihydropyrido[3,4,5-*g,h*] perimidine-6,8(1*H*,7*H*)-dione (**4**, 150 mg, 0.361 mmol) was suspended in 1,2-dichlorobenzene (5 ml) in a microwave reactor tube equipped with a magnetic stirrer. Then, tributylamine (858 µL, 3.61 mmol, 10 equiv.) was added and the reaction mixture was sealed under argon and irradiated at 200W (160 °C) for 3 hours. After cooling to room temperature the crude mixture was poured in diethyl ether (150 ml) and the brown-yellowish precipitate formed was filtered off and washed with diethyl ether (100 mL). The crude material was purified by flash chromatography (CH<sub>2</sub>Cl<sub>2</sub>/ methanol 10:1 to 7:3), yielding 34.7 mg (57.8 µmol, 17%) as a yellow solid.

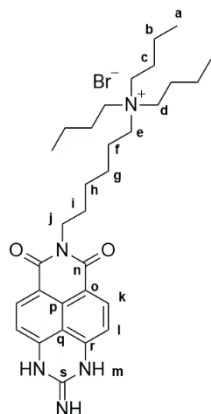

$R_f=0.29$  (CH<sub>2</sub>Cl<sub>2</sub>/ MeOH 7:3);

<sup>1</sup>H-NMR (300 MHz, 25 °C, DMSO-*d*<sub>6</sub>): δ = 8.10 (d, *J* = 9.0 Hz, 2H k), 7.84 (s, 2H m), 6.75 (d, *J* = 9.0 Hz, 2H l), 3.93 (t, *J* = 6.0 Hz, 2H e), 3.70 (q, *J* = 6.0 Hz, 2H j), 3.17 (t, *J* = 12.0 Hz, 6H d), 1.58- 1.53 (m, 10H c, f, i), 1.34- 1.25 (m, 10H b, g, h), 0.91 (t, *J* = 6.0 Hz, 9H a).

<sup>13</sup>C-NMR (75 MHz, 25 °C, DMSO-*d*<sub>6</sub>): δ = 163.26 (n), 154.28 (s), 134.49 (r), 130.52 (k), 114.00 (p), 109.86 (o), 62.81 (q), 60.83 (d), 49.02 (l), 47.96 (e), 30.89 (j), 30.80 (f), 28.00 (i), 26.84 (h), 25.66 (g), 23.82 (c), 19.66 (b), 13.93 (a).

HRMS (ESI+): *m/z* expected for [C<sub>31</sub>H<sub>46</sub>N<sub>5</sub>O<sub>2</sub>]<sup>+</sup> = 520.36515; observed 520.36303.

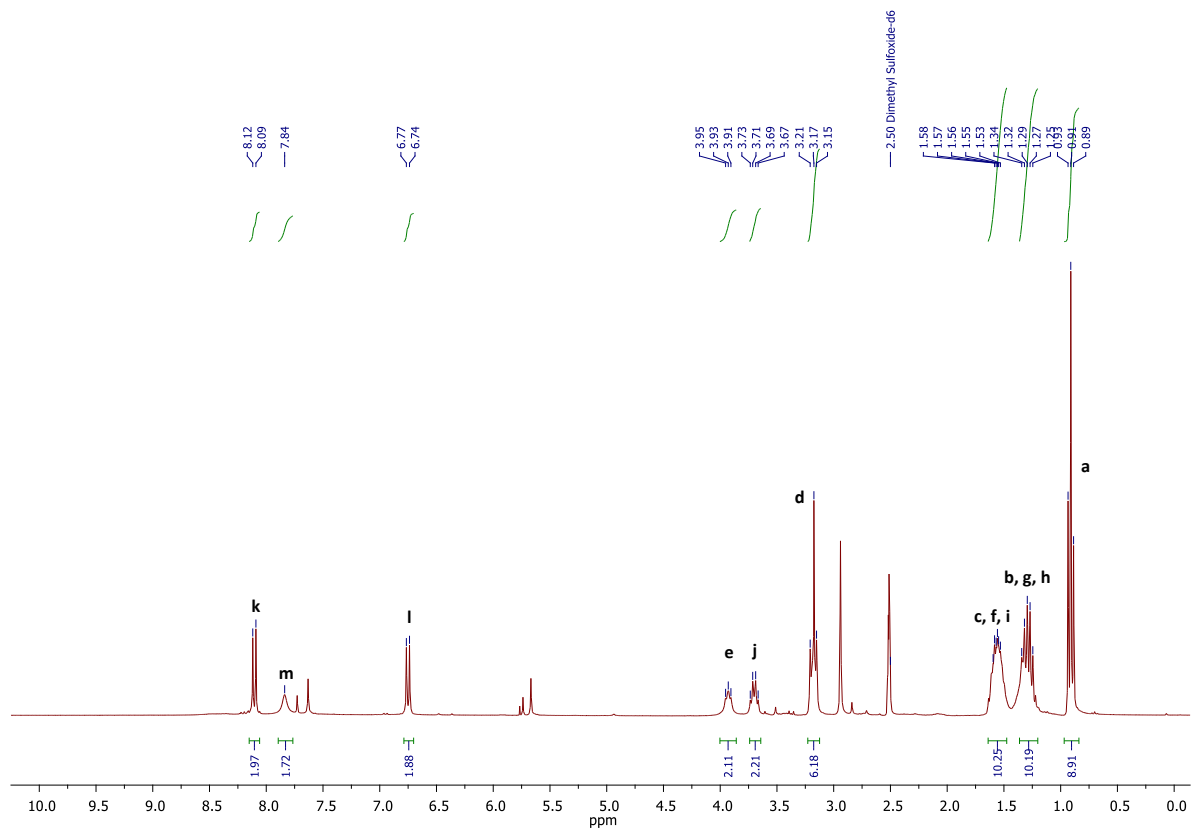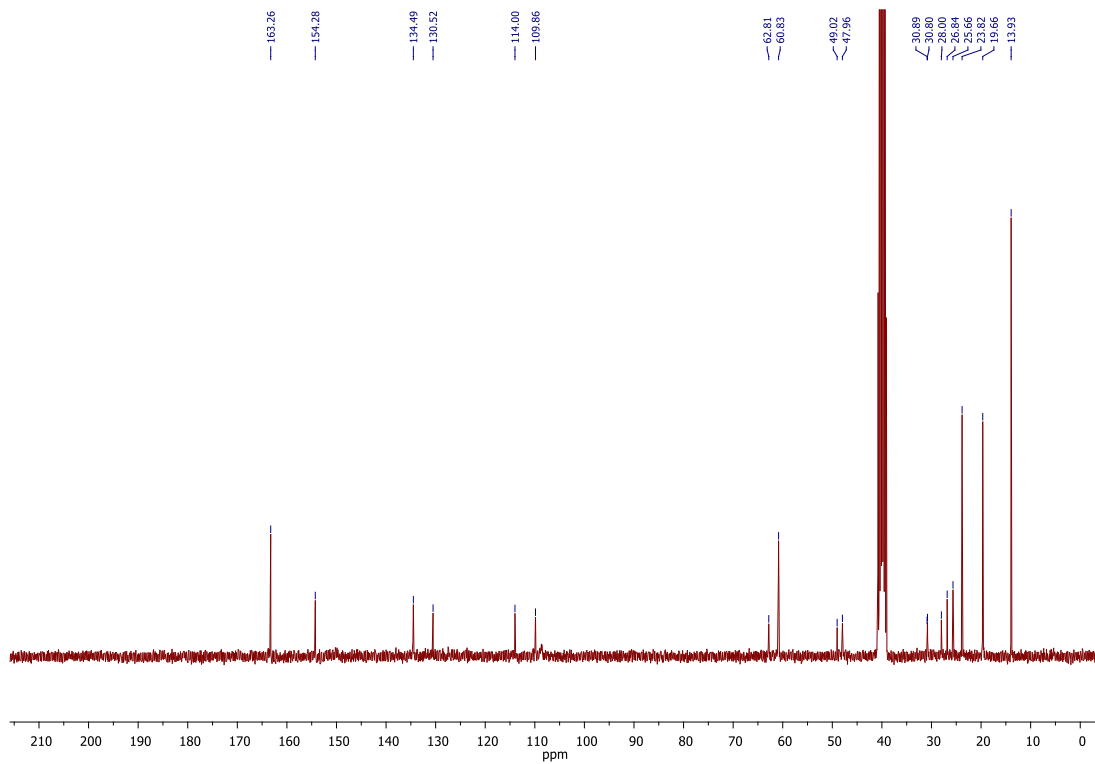

$^1\text{H}$ -NMR and  $^{13}\text{C}$ -NMR spectra of compound **NMI-LS** in  $\text{DMSO-d}_6$ .

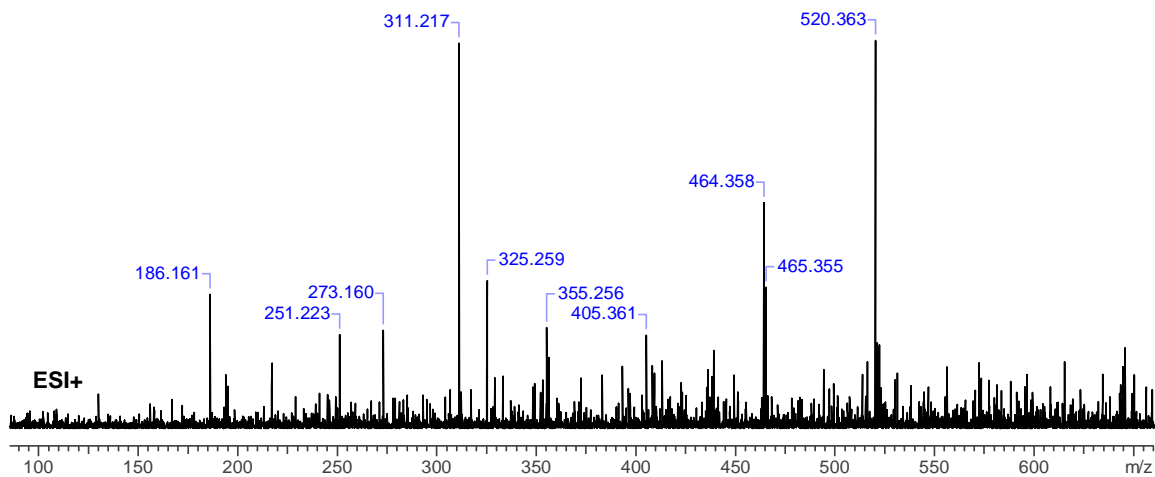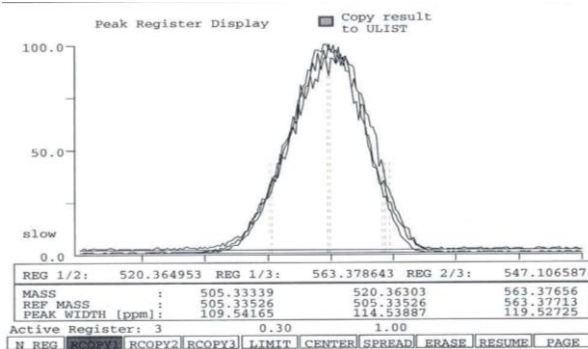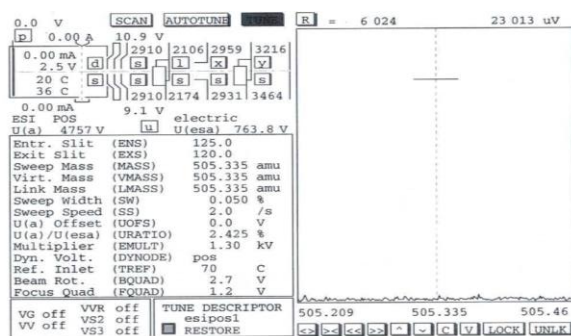

NMI-LS was measured dissolved in methanol, ion mode: ESI+. Fragmentation found: 520 [M-Br]<sup>+</sup>, 464 [M-Br-But]<sup>+</sup>, 405 [M-Br-2But]<sup>+</sup>, 311 [M-Br-Gua-Naph-CO]<sup>+</sup>, 251 [M-Br-(CH<sub>2</sub>)<sub>6</sub>NBut<sub>3</sub>]<sup>+</sup> McLafferty rearrangement, 186 [NBut<sub>3</sub>]<sup>+</sup>.

**Table S1:** Literature overview on lysosomal-targeted pH-sensitive dyes

| structure                                                                                                      | spectral range                                                                                                                                                              | readout                                                                                                                   | range of pH sensitivity | labelling time (concentration) | long term stability in cells                                                                                 | investigated biological samples         | notes                                                                                                                                                                   | references       |
|----------------------------------------------------------------------------------------------------------------|-----------------------------------------------------------------------------------------------------------------------------------------------------------------------------|---------------------------------------------------------------------------------------------------------------------------|-------------------------|--------------------------------|--------------------------------------------------------------------------------------------------------------|-----------------------------------------|-------------------------------------------------------------------------------------------------------------------------------------------------------------------------|------------------|
| <p>NMI-LS</p> 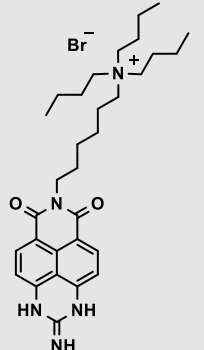                | $\lambda_{ex}$ =400-490 nm<br>$\lambda_{em}$ = 450-530 nm                                                                                                                   | excitation ratio<br>458 nm /405 nm<br>OR<br>emission ratio<br>467 nm /449 nm<br>OR<br>average<br>fluorescence<br>lifetime | 2-6                     | 30 min (0.5 $\mu$ M)           | 48 h                                                                                                         | HeLa cells                              | two photon excitation and FLIM readout possible                                                                                                                         | this publication |
| <p>FITC-labeled dextran</p>  | $\lambda_{ex}$ =450-495 nm<br>$\lambda_{em}$ = 510-530 nm                                                                                                                   | excitation ratio<br>495 nm /450 nm<br>OR<br>emission ratio<br>515 nm /610 nm                                              | 4-7                     | 16 h -3 d<br>(1 mg /ml)        | several days                                                                                                 | mouse macrophages,<br>human fibroblasts | commercially available                                                                                                                                                  | <sup>3-5</sup>   |
| <p>glyco- fluorescein/rhodamine-X-lactam probes</p>                                                            | $\lambda_{ex}$ =495 nm (fluorescein)<br>$\lambda_{ex}$ =595 nm (rhodamine-X-lactam)<br>$\lambda_{em}$ = 535 nm (fluorescein)<br>$\lambda_{em}$ =620 nm (rhodamine-X-lactam) | emission ratio (with changing excitation)<br>515 nm /610 nm (pH range 4-5)<br>and<br>610 nm / 515 nm (pH range 5-7.5)     | 4-7.5                   | 24 h (20 $\mu$ M)              | after 24 h superior retention compared to LysoTracker <sup>TM</sup> Red, also retention when acidity is lost | HeLa, U2OS and other cell lines         | dual wavelength excitation needed, no simultaneous acquisition of both emission peaks possible, i.e. artifacts by fast moving organelles might be induced in microscopy | <sup>6</sup>     |

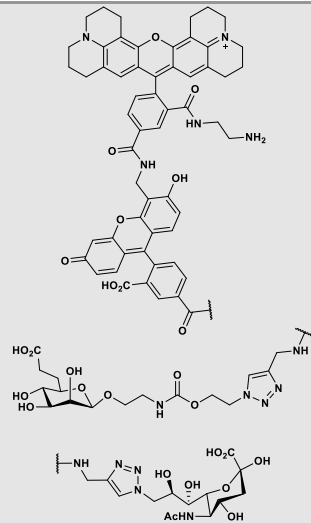

benzimidazole-based probe

$\lambda_{ex}=360$  nm

emission ratio

5-7

30 min (3  $\mu$ M)

not determined

HeLa cells,  
hippocampal  
slices

two-photon  
excitation possible

7

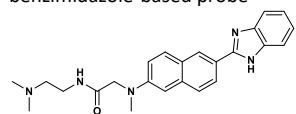

$\lambda_{ex}=740$  nm (two  
photon exc.)  
 $\lambda_{em}=400-550$ nm;  
 $\lambda_{em}=500-550$ nm  
(green channel)  
 $\lambda_{em}=474$  nm  
(isoemission  
point)

$I_{green} / I_{iso}$

carbazole-based probes

$\lambda_{ex}=390-490$  nm  
 $\lambda_{ex}=760$  nm (two  
photon exc.)  
 $\lambda_{em}=450-525$ nm  
(ch1, probe A)  
 $\lambda_{em}=575-650$ nm  
(ch2, probe A)  
 $\lambda_{em}=500-550$ nm  
(ch1, probe B)  
 $\lambda_{em}=625-700$ nm  
(ch2, probe B)

emission ratio  
 $I_{ch2} / I_{ch1}$

4-5 (probe A)  
4.5-5.5 (probe B)

30 min (30  $\mu$ M)

not determined

HeLa cells

two-photon  
excitation possible

8

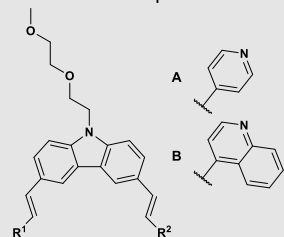

1: R<sup>1</sup> = R<sup>2</sup> = A  
2: R<sup>1</sup> = R<sup>2</sup> = B

naphthalene-naphthalimide-  
based probe

$\lambda_{ex}=405$ nm  
 $\lambda_{ex}=760$  nm (two  
photon exc.)

emission ratio  
 $I_{ch2} / I_{ch1}$

3-6.5

60 min (1  $\mu$ M)

not determined

HeLa cells,  
living tissue,  
zebrafish

FRET-based,  
two-photon  
excitation possible

9

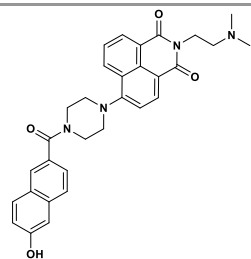

$\lambda_{em}$ = 415-475nm  
(ch1)  
 $\lambda_{em}$ = 495-540nm  
(ch2)

naphthalimide-rhodamine-based probe

$\lambda_{ex}$ =390-500nm  
 $\lambda_{ex}$ =780 nm (two photon exc.)  
 $\lambda_{em}$ = 400-550nm  
(ch1, deprotonated form)  
 $\lambda_{em}$ = 550-700nm  
(ch2, protonated form)

emission ratio  
 $I_{ch2} / I_{ch1}$  or  $I_{ch1} / I_{ch2}$

4-6

30 min – 6 h  
(1-10  $\mu$ M)

not determined

HeLa cells,  
zebrafish

FRET-based,  
two-photon  
excitation possible

<sup>10 11</sup>

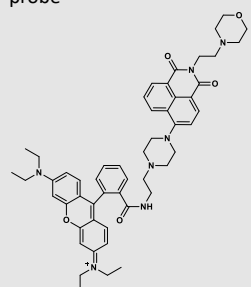

quinolone-based probe

$\lambda_{ex}$ =405 nm  
 $\lambda_{em}$ = 430-510nm  
(green, deprotonated form)  
 $\lambda_{em}$ = 520-600nm  
(yellow, protonated form)

emission ratio  
 $I_{green} / I_{yellow}$  (appr.  
494 nm / 570 nm)

4-6

30 min (2  $\mu$ M)

not determined

NIH 3T3 cells

<sup>12</sup>

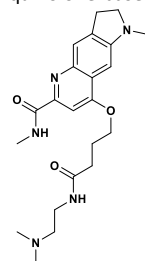

naphthalimide-coumarin-based probe

$\lambda_{ex}$ =380- 405 nm,  
 $\lambda_{ex}$ =380- 500 nm  
(protonated form)  
 $\lambda_{em}$ = 420-650nm

emission ratio  
530 nm /454 nm  
(pH range 4-6)  
and  
454 nm / 530 nm  
(pH range 6-8)

4.5-8

10 min (5  $\mu$ M)

not determined

HeLa cells

FRET-based

<sup>13</sup>

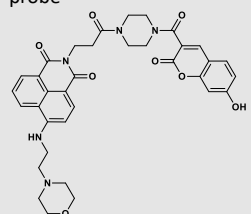

chromenoquinoline-based probe

$\lambda_{ex}$ =350- 470 nm,

emission ratio  
 $I_{red} / I_{green}$

4-6.5

15 min (5  $\mu$ M)

not determined

HeLa cells

<sup>14</sup>

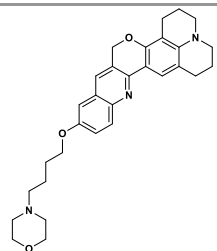

$\lambda_{ex}$ =350- 580 nm,  
(protonated form) (appr. 613 nm  
/560 nm)  
 $\lambda_{em}$ = 515-550nm  
(green, de-  
protonated form)  
 $\lambda_{em}$ = 570-620nm  
(red, protonated  
form)

porphyrin-pyranine-based probe

$\lambda_{ex}$ =405 nm  
 $\lambda_{em}$ = 400-500nm  
(blue)  
 $\lambda_{em}$ = 620-750nm  
(red)

emission ratio  
 $I_{red} / I_{blue}$   
(appr. 660 nm /  
435 nm)

2.5-8.5

30 min (7.5  $\mu$ M)

not determined

A549 cells

15

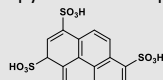

coumarin-rhodamine-based  
probe

$\lambda_{ex}$ =405 nm  
(coumarin),  
 $\lambda_{ex}$ =561 nm  
(rhodamine)  
 $\lambda_{em}$ = 410-490nm  
(green, coumarin)  
 $\lambda_{em}$ = 593-735nm  
(red, rhodamine)

emission ratio  
 $I_{red} / I_{green}$   
(appr. 605 nm  
/475 nm)

4.5-7

30 min (3  $\mu$ M)

not determined

HeLa cells

coumarin is always  
on, rhodamine  
activatable by  
acidity;  
dual wavelength  
excitation needed,  
no simultaneous  
acquisition of both  
emission peaks  
possible, i.e.  
artifacts by fast  
moving organelles  
might be induced in  
microscopy

16

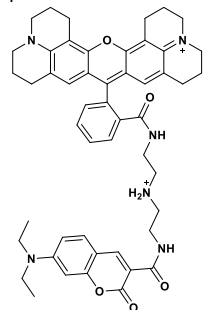

BODIPY-based probes

$\lambda_{ex}$ =500-650 nm  
(probe A)  
 $\lambda_{ex}$ =550-750 nm  
(probe B)  
 $\lambda_{em}$ = 515-565nm  
(ch1, probe A,B)  
 $\lambda_{em}$ = 650-700nm  
(ch2, probe A)

emission ratio  
 $I_{ch2} / I_{ch1}$

1-4

15 min (5  $\mu$ M)

not determined

A549 cells

17

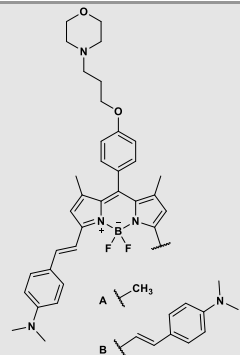

$\lambda_{em}$ = 675-725nm  
(ch2, probe B)

BODIPY- rhodamine-based probes

$\lambda_{ex}$ =430-500 nm  
(donor)  
 $\lambda_{em}$ = 500-550nm  
(ch1, donor)  
 $\lambda_{em}$ = 625-675nm  
(ch2, acceptor)

emission ratio  
 $I_{ch2} / I_{ch1}$  (lower  
pH range)  
or  
 $I_{ch1} / I_{ch2}$  (higher  
pH range)

3-6.5 (probe A)  
2.5-7 (probe B)

30 min (5-15  $\mu$ M)

not determined

HeLa cells

FRET-based

18

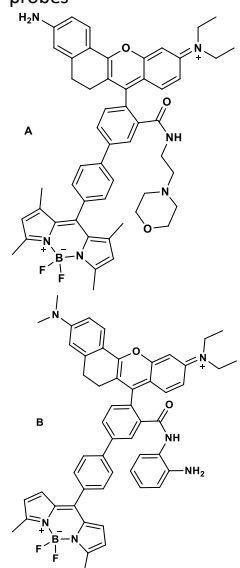

hemicyanine-based probe

$\lambda_{ex}$ =600-700 nm  
 $\lambda_{em}$ = 650-680nm  
(ch1)  
 $\lambda_{em}$ = 690-720nm  
(ch2)

emission ratio  
 $I_{ch1} / I_{ch2}$  (appr. 670  
nm / 708 nm)

4-6

5 min (50 nM)

not determined

MCF-7 cells, HeLa  
cells

19



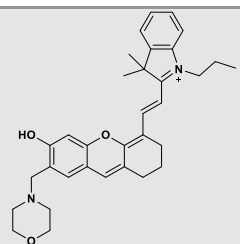

lanthanide probes

$\lambda_{ex}=355\text{ nm}$   
 $\lambda_{em}=450\text{-}570\text{ nm}$  (Tb)  
 $\lambda_{em}=605\text{-}720\text{ nm}$  (Eu)

emission ratio  
 $I_{Tb} / I_{Eur}$

5-7

1-3 h (30-200  $\mu\text{M}$ )

not determined

several cell lines  
 (NIH-3T3, CHO, PC3, MCF7, HeLa)

ratiometric imaging performed with mixture of Tb and Eur complexes of L<sup>2</sup>

20

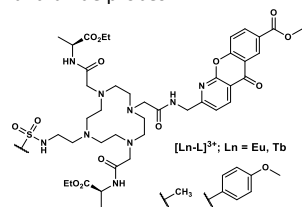

spirocyclic rhodamine-lactam-based probes

$\lambda_{ex}=480\text{ nm}$   
 $\lambda_{em}=550\text{-}650\text{ nm}$

emission intensity at appr. 580 nm increased in protonated form

4-7

45 min (1  $\mu\text{M}$ )

after 2 h superior retention compared to LysoTracker<sup>TM</sup> Green, retention observed for 48 h

several cell lines

21

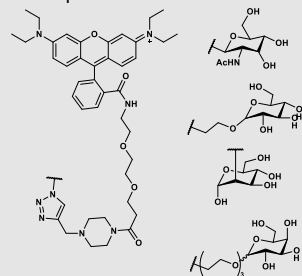

rhodamine-based probe

$\lambda_{ex}=525\text{-}560\text{ nm}$   
 $\lambda_{em}=560\text{-}630\text{ nm}$

emission intensity at 578 nm increased in protonated form

4.5-7

30 min (10  $\mu\text{M}$ )

not determined

several cell lines (MCF-7, HeLa, Raw 264.7)

22

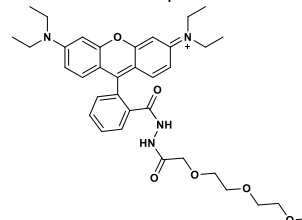

rhodamine-based probe

$\lambda_{ex}=563\text{ nm}$   
 $\lambda_{em}=570\text{-}650\text{ nm}$

emission intensity at 589 nm

4.5-7

3-12 h (1-5  $\mu\text{M}$ )

not determined

HeLa cells

23

|                                                                                                                  |                                                        |                                                           |                                    |                         |                |                                   |                                                                       |    |
|------------------------------------------------------------------------------------------------------------------|--------------------------------------------------------|-----------------------------------------------------------|------------------------------------|-------------------------|----------------|-----------------------------------|-----------------------------------------------------------------------|----|
| 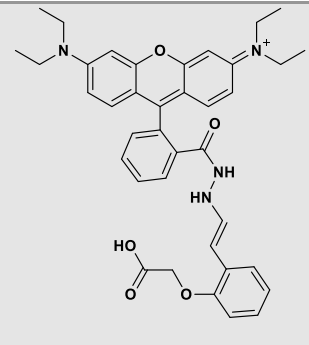                                |                                                        | increased in protonated form                              |                                    |                         |                |                                   |                                                                       | 24 |
| <p>rhodamine-based probes</p>   | $\lambda_{ex}=540-555$ nm<br>$\lambda_{em}=560-630$ nm | emission intensity at 583 nm increased in protonated form | 4-6 (probe A)<br>4.4-6.5 (probe B) | 30 min (5 $\mu$ M)      | not determined | HeLa cells                        |                                                                       | 24 |
| <p>rhodamine-based probe</p>    | $\lambda_{ex}=540$ nm<br>$\lambda_{em}=560-630$ nm     | emission intensity at 586 nm increased in protonated form | 3-6                                | 30 min (5 $\mu$ M)      | not determined | several cell lines (MCF-7, HepG2) | additional live cell imaging in mice showing tissue with decreased pH | 25 |
| <p>rhodamine-based probe</p>   | $\lambda_{ex}=550$ nm<br>$\lambda_{em}=560-640$ nm     | emission intensity at 588 nm increased in protonated form | 3-6.5                              | 30 min (3 $\mu$ M)      | not determined | HeLa cells                        |                                                                       | 26 |
| <p>rhodamine-based probe</p>  | $\lambda_{ex}=600$ nm<br>$\lambda_{em}=620-730$ nm     | emission intensity at 650 nm increased in protonated form | 4.5-6                              | 20-30 min (1-4 $\mu$ M) | not determined | HeLa cells                        |                                                                       | 27 |

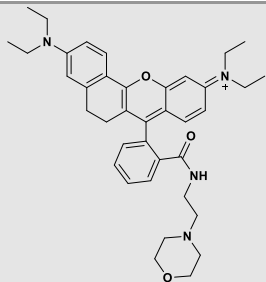

spirocyclic probes

$\lambda_{ex}=635$  nm  
 $\lambda_{em}=700-800$  nm

emission intensity at 743 nm increased in protonated form

4-7

2 h (5-20  $\mu$ M)

not determined

several cell lines (MDA-MB-231, HUVEC)

28

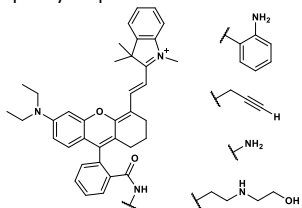

Quinoline-benzothiazole probe

$\lambda_{ex}=300-405$  nm  
 $\lambda_{em}=410-480$  nm

emission intensity at 428 nm decreased in protonated form

3-5

20 min (10  $\mu$ M)

not determined

several cell lines (HeLa, HepG2)

29

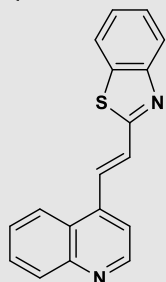

galactosyl naphthalimide-piperazine probe

$\lambda_{ex}=390-430$  nm  
 $\lambda_{em}=500-600$  nm

emission intensity at 530 nm increased in protonated form

5-8

40 min (20  $\mu$ M)

not determined

HepG2 cells

30

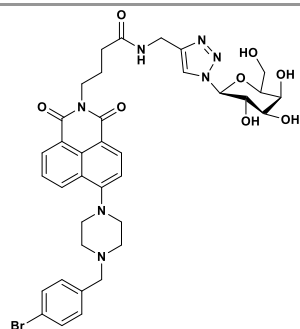

NBD-based probe

$\lambda_{\text{ex}}=445 \text{ nm}$   
 $\lambda_{\text{em}}=500-600 \text{ nm}$

emission intensity at 530 nm increased in protonated form

3-6

30-120 min (1-10  $\mu\text{M}$ )

not determined

HeLa cells

31

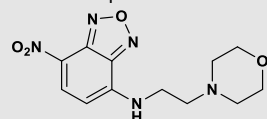

naphthalimide-based probe

$\lambda_{\text{ex}}=450-488 \text{ nm}$   
 $\lambda_{\text{ex}}=800 \text{ nm}$  (two photon exc.)  
 $\lambda_{\text{em}}=500-600 \text{ nm}$

emission intensity at 531 nm increased in protonated form

4-8

30 min (2  $\mu\text{M}$ )

not determined

HeLa cells

two-photon excitation possible

32

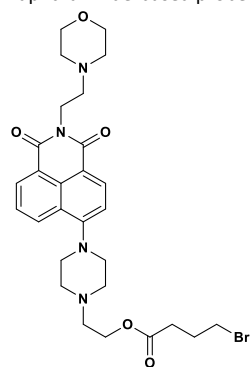

dicyanoisophorone-based probe

$\lambda_{\text{ex}}=400-500 \text{ nm}$   
 $\lambda_{\text{em}}=600-800 \text{ nm}$

emission intensity at 730nm increased in protonated form

4-8

30 min (10  $\mu\text{M}$ )

not determined

HeLa cells

33

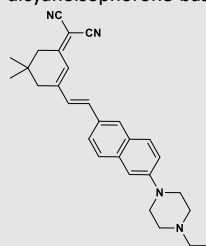

Darrow Red-based probes

$\lambda_{\text{ex}}=570 \text{ nm}$

emission intensity

2-4 (probe A)

10-15min (10  $\mu\text{M}$ )

not determined

several cell lines

34

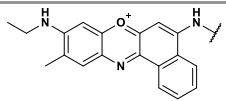

$\lambda_{em}=580-850$  nm

at appr. 660-670 nm  
increased in protonated form

5-7 (probe B)  
6-9 (probe C)

(HeLa, KB, VL79)

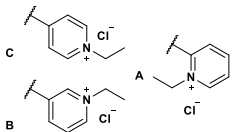

**BODIPY-based probes**

$\lambda_{ex}=600-700$  nm

$\lambda_{em}=650-850$  nm

emission intensity at 715nm  
increased in protonated form

2.5-6

2 h (5  $\mu$ M)

not determined

several cell lines (MDA-MB-231, HUVEC)

35

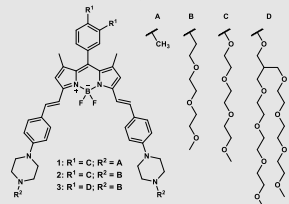

**Table S2:** TD- $\omega$ PBEhPBE/6-31G(d)/PCM(DMSO) calculated wavelengths ( $\lambda$ , nm) and oscillator strengths ( $f$ ) of the LW-AT of the stable conformers of imino-NMI-LS(+) and imino-NMI-LS(2+)

| Conformer | imino-NMI-LS(+) |        |        |        | imino-NMI-LS(2+) |        |
|-----------|-----------------|--------|--------|--------|------------------|--------|
|           | 1               | 2      | 3      | 4      | 1                | 2      |
| $\lambda$ | 474             | 476    | 478    | 474    | 470              | 463    |
| $f$       | 0.0018          | 0.0008 | 0.0021 | 0.0022 | 0.0002           | 0.0001 |

**Table S3:** Calculated extinction coefficients of different bands in the absorbance spectra of NMI-LS in buffers of different pH. Data are given as  $\lambda_{\max}$  in nm ( $\epsilon$  in  $\text{mol}^{-1}\text{dm}^3\text{cm}^{-1}$ )

| pH   | band 1        | band 2        | band 3        |
|------|---------------|---------------|---------------|
| 1.4  | 463.5 (8215)  | 431.5 (17649) | 413.0 (17203) |
| 2.4  | 463.5 (12657) | 433.0 (17724) | 413.0 (15652) |
| 3.1  | 463.5 (16064) | 436.5 (16465) | 413.0 (13477) |
| 3.7  | 463.5 (21232) | 437.5 (18150) |               |
| 4.1  | 463.5 (21994) | 437.5 (16743) |               |
| 4.4  | 463.5 (23510) | 440.0 (16710) |               |
| 4.6  | 463.5 (27121) | 440.0 (19351) |               |
| 4.9  | 463.5 (28117) |               |               |
| 5.4  | 463.5 (28115) |               |               |
| 6.5  | 463.5 (28108) |               |               |
| 7.5  | 463.5 (25574) |               |               |
| 8.3  | 465.0 (22892) |               |               |
| 10.7 | 463.5 (23577) |               |               |

**Table S4:** Fit results for the determination of  $pK_a'$  according to equation 3 (main document) and estimation of  $pK_a$  from intensity values of maximal protonation/ deprotonation determined for the excitation ratios 462 nm /413 nm, 458 nm /405 nm and the emission ratios 467 nm/449 nm according to equation 2 (main document).

|                  | excitation ratio<br>462 nm/413 nm | excitation ratio<br>458 nm/405 nm | emission ratio<br>467 nm/449 nm |
|------------------|-----------------------------------|-----------------------------------|---------------------------------|
| $pK_a'$          | 4.33                              | 4.39                              | 5.33                            |
| $R_{min}$        | 0.12                              | 0.08                              | 0.86                            |
| $R_{max}$        | 5.44                              | 6.50                              | 14.31                           |
| $c$              | 1.34                              | 1.28                              | 1.73                            |
| $\log(I_a/I_b)$  | 1.03                              | 1.18                              | 2.19                            |
| estimated $pK_a$ | 3.3                               | 3.21                              | 3.14                            |

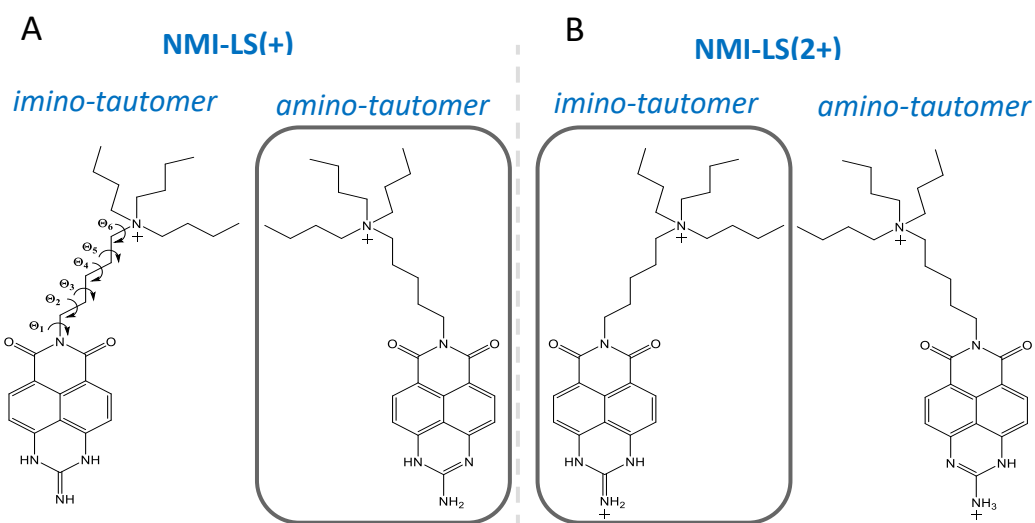

**Figure S1:** Chemical structures of the imino (left in each half) and of the amino (right in each half) tautomer of NMI-LS in its (A) deprotonated and (B) protonated form used for the DFT calculations; the more stable tautomer of each form is framed; the torsion angles rotated during the conformational search are denoted on imino-NMI-LS(+).

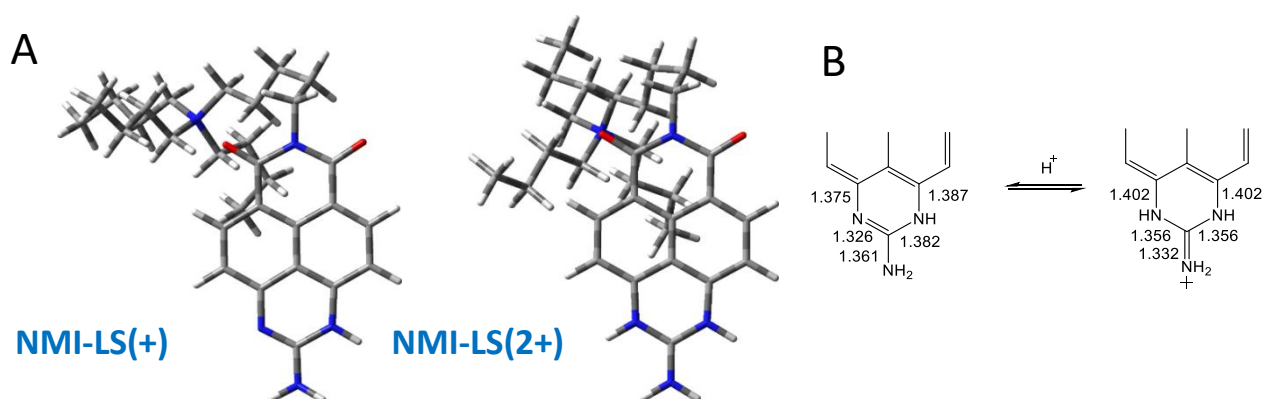

**Figure S2:** (A) Optimized geometries of the most stable tautomers of NMI-LS(+) (left) and NMI-LS(2+) (right), which were used for calculation of the absorption transitions and (B) electron density redistribution causing the hypsochromic shift of the longest-wavelength electronic transition upon protonation

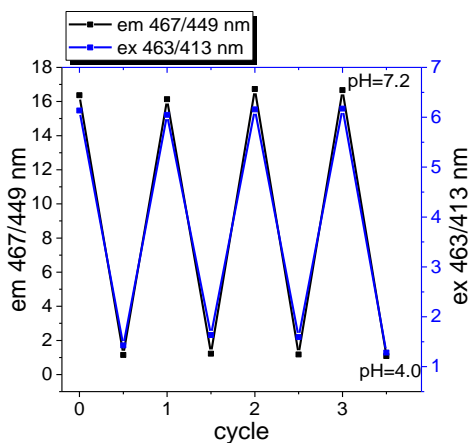

**Figure S3:** Reversibility of spectral changes at different pH values. Ratios of fluorescence intensity of emission peaks 467/449 nm (black squares) and excitation peaks 463/413 nm (blue diamonds) remain constant after several cycles of pH shifts.

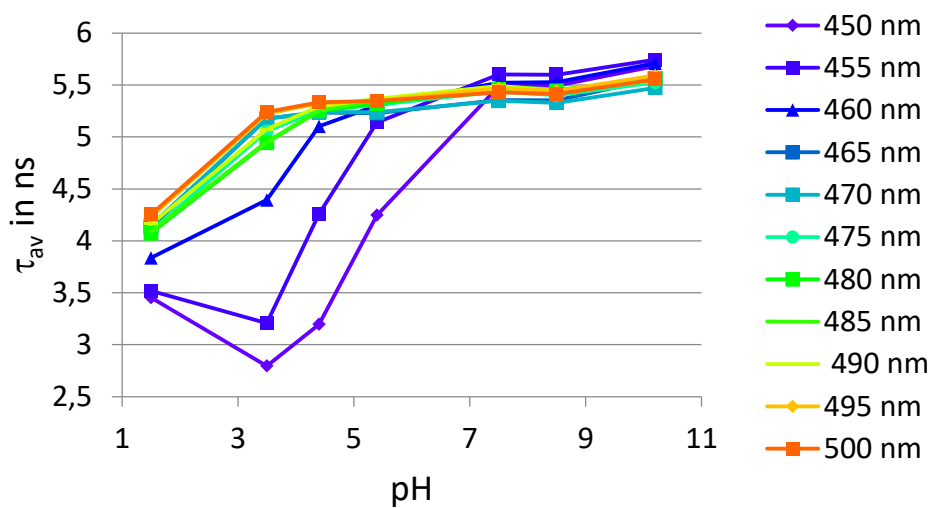

**Figure S4.** Time-resolved emission of NMI-LS (3  $\mu$ M) in buffers of different pH values. Fluorescence lifetimes of NMI-LS at different pH values and emission wavelengths ( $\lambda_{ex}=440$  nm), biexponential fit;  $\tau_{av}=a_1\tau_1+a_2\tau_2$ .



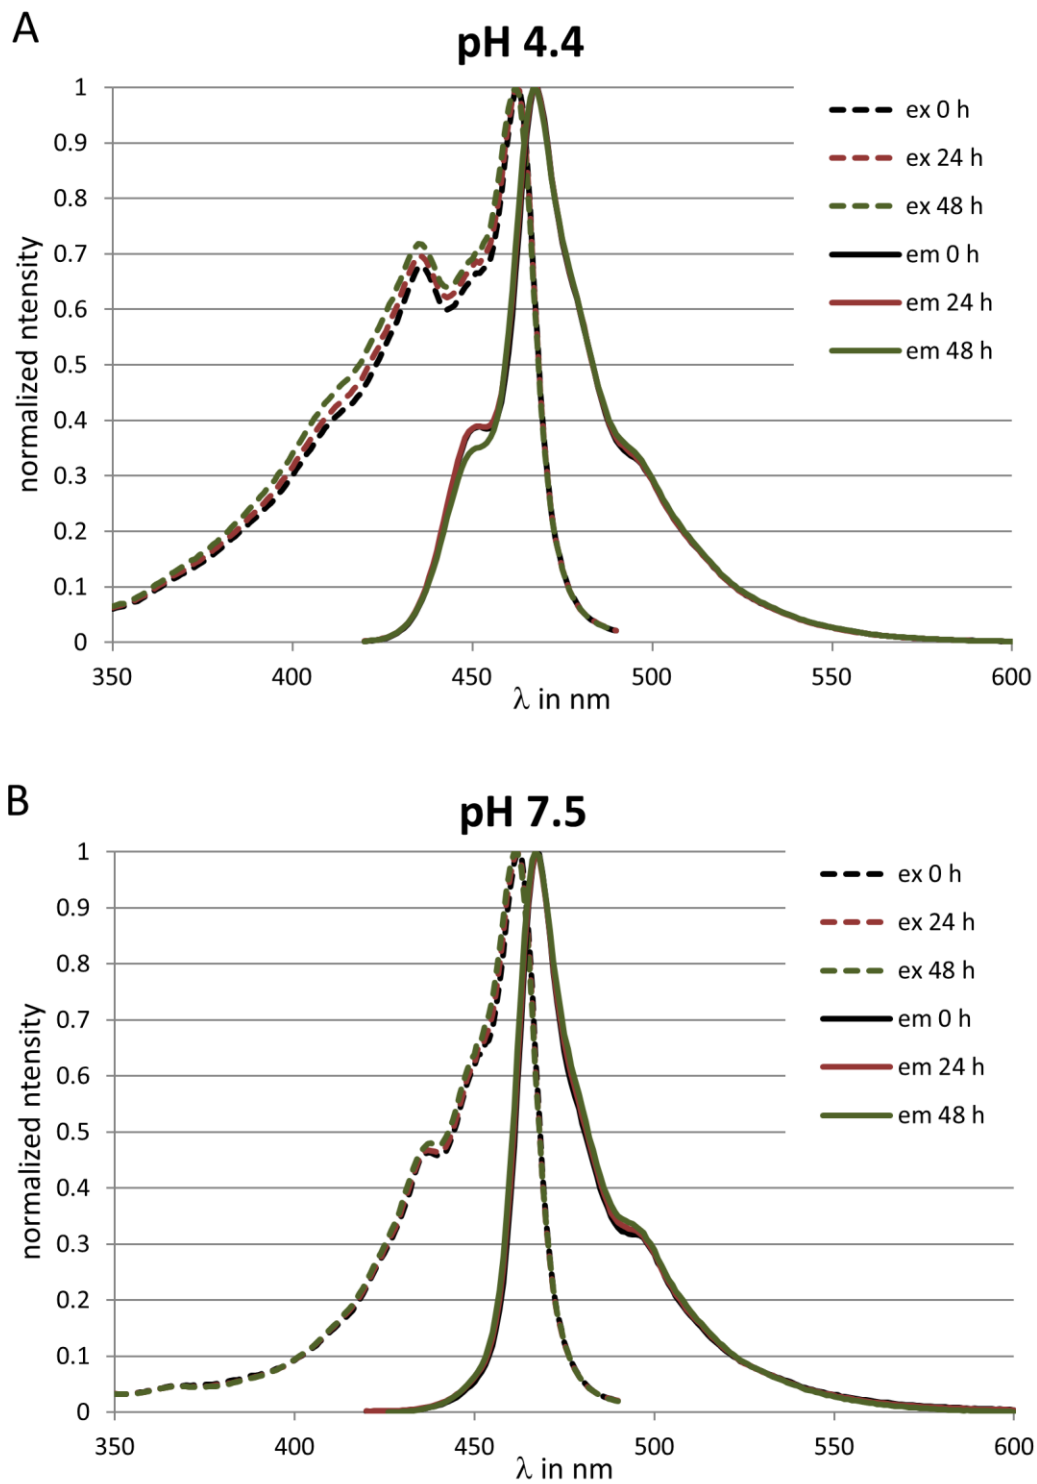

**Figure S5** Fluorescence excitation (dashed lines) and emission (solid lines) spectra of NMI-LS in aqueous buffer after incubation for a time period of 48 h at 37°C. A) pH 4.4 or B) pH 7.5.

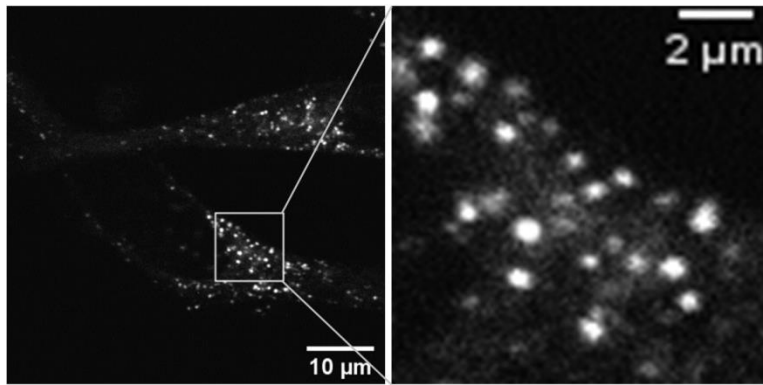

**Figure S6.** NMI-LS-labeled HeLa cells imaged using two-photon excitation at 900 nm. The right panel shows a magnified view of the area indicated by a square in the left panel.

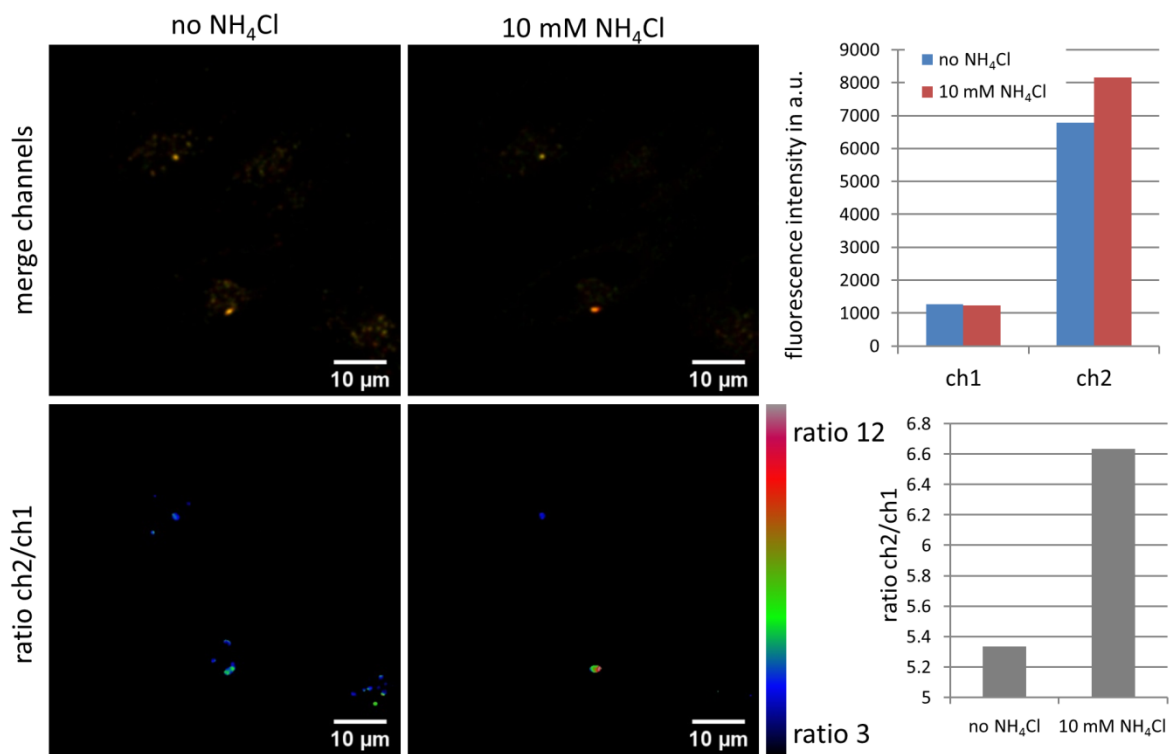

**Figure S7.** Ratiometric emission before and 2.5 min after the addition of 10 mM ammonium chloride. The sample was imaged using two-photon excitation at 880 nm. Emission was monitored from 410-455 nm (ch1, green) and 466-518 nm (ch2, red). The lower panels show the ratio between emission of ch2/ch1. An increase in the pH is visualized by an increase in this ratio.

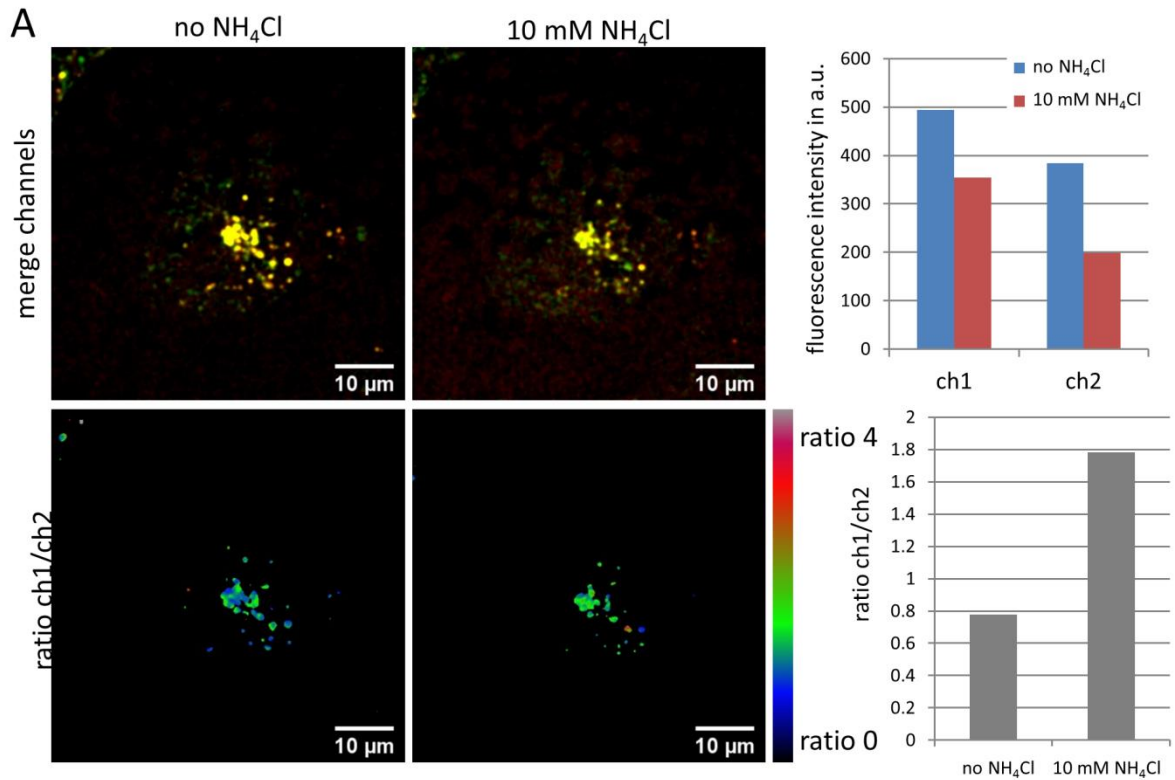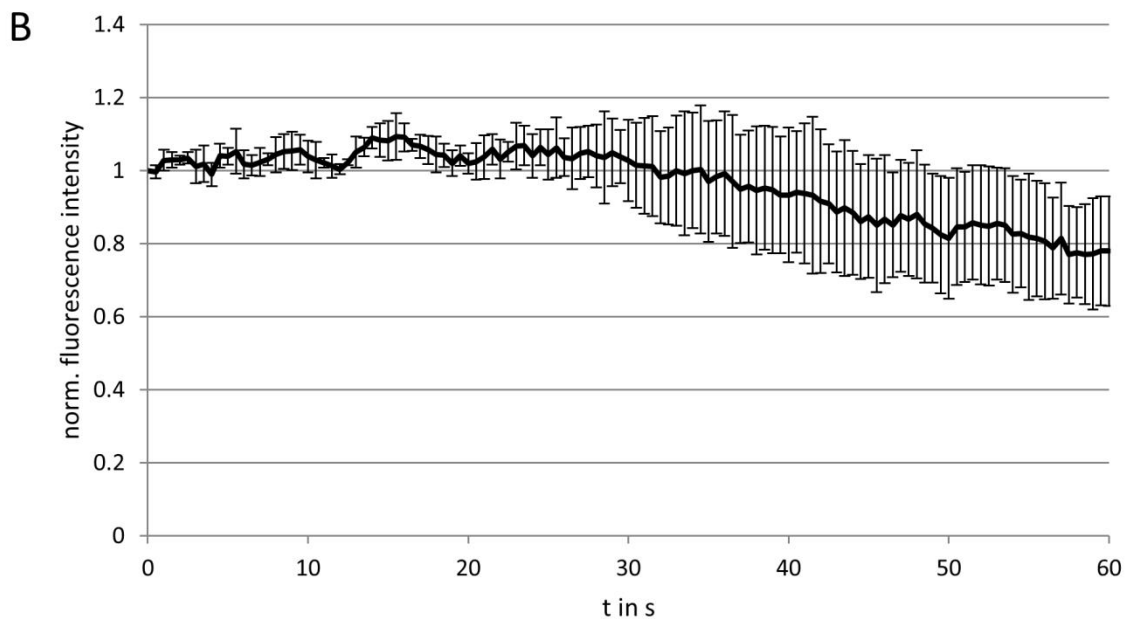

**Figure S8.** A) Ratiometric emission scan of the commercial LSYB dextran before and 2 min after the addition of 10 mM ammonium chloride. The sample was imaged using two-photon excitation at 730 nm. Emission was monitored from 419-499 nm (ch1, green) and 517-624 nm (ch2, red). The lower panels show the ratio between emission of ch1/ch2. An increase in the pH is visualized by an increase in this ratio. B) Photostability of LSYB upon excitation at 720 nm, 14.4 mW. Time lapse images (1024 x 1024 pixels) were acquired in 3 FOV for 60 min every 30 s with a pixel dwell time of 1.58  $\mu$ s. Data represent mean  $\pm$  standard deviation of background-corrected intensity of 3 FOV normalized to the first acquired image.

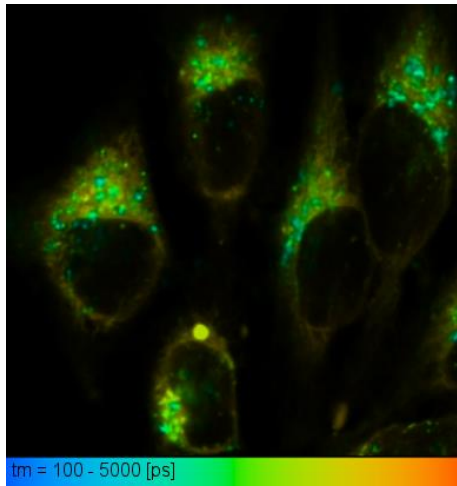

**Figure S9** Average fluorescence lifetimes of NMI-LS in HeLa cells (two-photon excitation  $\lambda_{\text{ex}}=900$  nm , 80 MHz,  $\lambda_{\text{em}}=430-490$  nm), biexponential fit;  $\tau_{\text{AV}}=a_1\tau_1+a_2\tau_2$ .

## References

1. D. Uersfeld, S. Stappert, C. Li and K. Mullen, *Adv Synth Catal*, 2017, **359**, 4184-4189.
2. S. Kaloyanova, Y. Zagranyarski, S. Ritz, M. Hanulova, K. Koynov, A. Vonderheit, K. Mullen and K. Peneva, *J Am Chem Soc*, 2016, **138**, 2881-2884.
3. S. Ohkuma and B. Poole, *Proc Natl Acad Sci U S A*, 1978, **75**, 3327-3331.
4. M. J. Geisow, *Exp Cell Res*, 1984, **150**, 29-35.
5. I. Eriksson, K. Öllinger and H. Appelqvist, in *Lysosomes: Methods and Protocols*, eds. K. Öllinger and H. Appelqvist, Springer New York, New York, NY, 2017, DOI: 10.1007/978-1-4939-6934-0\_11, pp. 179-189.
6. E. Zhang, S. Wang, X. Su and S. Han, *Analyst*, 2020, DOI: 10.1039/c9an02441g.
7. H. J. Kim, C. H. Heo and H. M. Kim, *J Am Chem Soc*, 2013, **135**, 17969-17977.
8. T. Zhang, D. Xu, C. Y. Poon, X. Wang, F. Bolze, H. W. Li and M. S. Wong, *Talanta*, 2019, **202**, 34-41.
9. X. J. Zhao, C. Wang, G. Q. Yuan, H. Y. Ding, L. Y. Zhou, X. G. Liu and Q. L. Lin, *Sensor Actuat B-Chem*, 2019, **290**, 79-86.
10. G. Q. Yuan, H. Y. Ding and L. Y. Zhou, *Spectrochim Acta A*, 2020, **224**.
11. X. F. Zhang, T. Zhang, S. L. Shen, J. Y. Miao and B. X. Zhao, *J Mater Chem B*, 2015, **3**, 3260-3266.
12. G. Li, D. Zhu, L. Xue and H. Jiang, *Org Lett*, 2013, **15**, 5020-5023.
13. B. L. Dong, X. Z. Song, C. Wang, X. Q. Kong, Y. H. Tang and W. Y. Lin, *Analytical Chemistry*, 2016, **88**, 4085-4091.
14. X. J. Liu, Y. A. Su, H. H. Tian, L. Yang, H. Y. Zhang, X. Z. Song and J. W. Foley, *Analytical Chemistry*, 2017, **89**, 7038-7045.
15. J. H. Zhang, M. L. Zhu, J. W. Cui, C. M. Wang, Z. W. Zhou, T. H. Wang, L. Gong, C. R. Su, D. D. Qi, Y. Z. Bian, H. W. Du and J. Z. Jiang, *J Photoch Photobio A*, 2020, **396**.
16. Z. W. Xue, H. Zhao, J. Liu, J. H. Han and S. F. Han, *Acs Sensors*, 2017, **2**, 436-442.
17. M. L. Zhu, P. P. Xing, Y. B. Zhou, L. Gong, J. H. Zhang, D. D. Qi, Y. Z. Bian, H. W. Du and J. Z. Jiang, *J Mater Chem B*, 2018, **6**, 4422-4426.
18. S. Xia, M. X. Fang, J. B. Wang, J. H. Bi, W. Mazi, Y. B. Zhang, R. L. Luck and H. Y. Liu, *Sensor Actuat B-Chem*, 2019, **294**, 1-13.
19. Q. Q. Wan, S. M. Chen, W. Shi, L. H. Li and H. M. Ma, *Angew Chem Int Edit*, 2014, **53**, 10916-10920.
20. D. G. Smith, B. K. McMahon, R. Pal and D. Parker, *Chem Commun (Camb)*, 2012, **48**, 8520-8522.
21. X. Chen, Y. Bi, T. Wang, P. Li, X. Yan, S. Hou, C. E. Bammert, J. Ju, K. M. Gibson, W. J. Pavan and L. Bi, *Sci Rep*, 2015, **5**, 9004.
22. H. Zhu, J. L. Fan, Q. L. Xu, H. L. Li, J. Y. Wang, P. Gao and X. J. Peng, *Chem Commun*, 2012, **48**, 11766-11768.
23. H. S. Lv, S. Y. Huang, Y. Xu, X. Dai, J. Y. Miao and B. X. Zhao, *Bioorg Med Chem Lett*, 2014, **24**, 535-538.
24. K. K. Yu, K. Li, J. T. Hou, H. H. Qin, Y. M. Xie, C. H. Qian and X. Q. Yu, *Rsc Adv*, 2014, **4**, 33975-33980.
25. B. Li, G. B. Ge, L. L. Wen, Y. Yuan, R. Zhang, X. J. Peng, F. Y. Liu and S. G. Sun, *Dyes Pigments*, 2017, **139**, 318-325.
26. D. Lee, K. M. K. Swamy, J. Hong, S. Lee and J. Yoon, *Sensor Actuat B-Chem*, 2018, **266**, 416-421.
27. G. L. Niu, P. P. Zhang, W. M. Liu, M. Q. Wang, H. Y. Zhang, J. S. Wu, L. P. Zhang and P. F. Wang, *Analytical Chemistry*, 2017, **89**, 1922-1929.
28. G. K. Vegesna, J. Janjanam, J. H. Bi, F. T. Luo, J. T. Zhang, C. Olds, A. Tiwari and H. Y. Liu, *J Mater Chem B*, 2014, **2**, 4500-4508.
29. L. Fan, M. Nan, J. Y. Ge, X. D. Wang, B. Lin, W. J. Zhang, S. M. Shuang and C. Dong, *New J Chem*, 2018, **42**, 13479-13485.
30. Y. X. Fu, J. J. Zhang, H. Wang, J. L. Chen, P. Zhao, G. R. Chen and X. P. He, *Dyes Pigments*, 2016, **133**, 372-379.
31. X. J. Cao, L. N. Chen, X. Zhang, J. T. Liu, M. Y. Chen, Q. R. Wu, J. Y. Miao and B. X. Zhao, *Anal Chim Acta*, 2016, **920**, 86-93.
32. C. Wang, B. L. Dong, X. Q. Kong, N. Zhang, W. H. Song and W. Y. Lin, *Luminescence*, 2018, **33**, 1275-1280.
33. W. Shen, L. Wang, S. Zhu, S. Yu, C. Cai, W. Yi and Q. Zhu, *Anal Biochem*, 2020, **596**, 113609.
34. D. D. He, W. Liu, R. Sun, C. Fan, Y. J. Xu and J. F. Ge, *Analytical Chemistry*, 2015, **87**, 1499-1502.
35. J. T. Zhang, M. Yang, C. Li, N. Dorh, F. Xie, F. T. Luo, A. Tiwari and H. Y. Liu, *J Mater Chem B*, 2015, **3**, 2173-2184.
